# Supplementary material for: Short Video Engagement and Digital Political Participation: The Mediating Roles of Political Education ldentification and Cultural Understanding
Source: Research Square preprint supplement (doi:10.21203/rs.3.rs-7259640/v1), 2025-10-03
Supplement: Supplementary file 1 [file 19482c86b9d95a839b81f20c.docx]

**Appendix 1：**Questionnaires

| Code | Items | | Source | |
| --- | --- | --- | --- | --- |
| short video useage Frequency | | | | |
| FSVU1 | I often view short videos. | | (Qin et al.,2023) | |
| FSVU2 | I often comment on short videos. | | (Qin et al.,2023) | |
| FSVU3 | I often repost or retweet short videos. | | (Qin et al.,2023) | |
| FSVU4 | I often save or collect short videos. | | (Qin et al.,2023) | |
| Perceived Emotional and Sensory Value | | | | |
| PESV1 | I often find short video content visually and aurally appealing | | (Xie et al.,2025) | |
| PESV2 | I often feel immersed when watching short video content. | | (Xie et al.,2025) | |
| PESV3 | I often feel emotionally connected to the short video content I watch. | | (Xie et al.,2025) | |
| PESV4 | I am often emotionally moved by short video content. | | (Xie et al.,2025) | |
| Short Video Engagement Experience | | | | |
| SVEE1 | I lost track of time | | Wang(2020) | |
| SVEE2 | I felt that the displayed environment was part of the real world. | | Wang(2020) | |
| SVEE3 | I felt surrounded by the displayed environment. | | Wang(2020) | |
| SVEE4 | It seemed like the video character(s) and I were interacting. | | Wang(2020) | |
| SVEE5 | It seemed like character(s) or entities from the video were communicating with me | | Wang(2020) | |
| SVEE6 | I feel as if I were accompanied with the video character(S) | | Wang(2020) | |
| Political Education Identification | | | |
| PEI1 | I know what media education (ME) is and can describe its core ideas. | Mateus&Hernández(2019) | |
| PEI2 | I am aware of media education-related policies or initiatives in my country. | Mateus&Hernández(2019) | |
| PEI3 | I have received basic training or courses related to political or media education. | Mateus&Hernández(2019) | |
| PEI4 | I believe media education should be a required part of university education. | Mateus&Hernández(2019) | |
| PEI5 | I believe the lack of training in political/media education hinders my future professional development. | Mateus&Hernández(2019) | |
| Cultural Understanding | | | |
| CU1 | I believe Chinese culture has profound history and unique charm. | Stretch(2001) | |
| CU2 | I am proud to have grown up in Chinese cultural traditions. | Stretch(2001) | |
| CU3 | I am willing to introduce Chinese culture to international friends. | Stretch(2001) | |
| CU4 | I believe Chinese culture remains vital and influential in a globalized world | Stretch(2001) | |
| CU5 | I think many values in Chinese culture are worth learning from globally | Stretch(2001) | |
| Digital Political Participation Willingness | | | |
| DPPW1 | I regularly use digital tools (e.g., social media, AI, short video platforms) in my daily life. | Zhao& Cao(2024) | |
| DPPW2 | I often use digital tools to access political or social information. | Zhao& Cao(2024) | |
| DPPW3 | I think using digital tools for political participation is important for personal and societal development. | Zhao& Cao(2024) | |
| DPPW4 | As a college student, I believe it is important to pay attention to how digital tools shape political participation. | Zhao& Cao(2024) | |
| DPPW5 | I believe using digital tools for political engagement helps me fulfill my social responsibilities. | Zhao& Cao(2024) | |
